# Supplementary material
Source: PubMed Central journal article supplement (PMC8085086)
Supplement: NIHMS1673610-supplement-1.pdf [file NIHMS1673610-supplement-1.pdf]

**Supplementary Table 1. Statistical tests**

| Figures        | Statistical test                                                                                                                                                                       | Comparisons               | p-value  |
|----------------|----------------------------------------------------------------------------------------------------------------------------------------------------------------------------------------|---------------------------|----------|
| 1d_food intake | Two-way ANOVA with Fisher's LSD test                                                                                                                                                   | Light:WT vs. Dark:WT      | 0.0002   |
|                |                                                                                                                                                                                        | Light:KO vs. Dark:KO      | 0.0007   |
|                |                                                                                                                                                                                        | Dark:WT vs. Dark:KO       | 0.6011   |
|                |                                                                                                                                                                                        | Light:WT vs. Light:KO     | > 0.9999 |
| 1f_GTT_ZT0     | Two-way ANOVA with Holm-Sidak's multiple comparisons test                                                                                                                              | WT vs. KO 0 min           | 0.2889   |
|                |                                                                                                                                                                                        | WT vs. KO 15 min          | 0.6357   |
|                |                                                                                                                                                                                        | WT vs. KO 30 min          | 0.8518   |
|                |                                                                                                                                                                                        | WT vs. KO 60 min          | 0.0929   |
|                |                                                                                                                                                                                        | WT vs. KO 90 min          | 0.0317   |
|                |                                                                                                                                                                                        | WT vs. KO 120 min         | 0.0362   |
| 1h_GTT_ZT12    | Two-way ANOVA with Holm-Sidak's multiple comparisons test                                                                                                                              | WT vs. KO 0 min           | 0.6719   |
|                |                                                                                                                                                                                        | WT vs. KO 15 min          | 0.0002   |
|                |                                                                                                                                                                                        | WT vs. KO 30 min          | < 0.0001 |
|                |                                                                                                                                                                                        | WT vs. KO 60 min          | 0.0006   |
|                |                                                                                                                                                                                        | WT vs. KO 90 min          | 0.2643   |
|                |                                                                                                                                                                                        | WT vs. KO 120 min         | 0.5829   |
| 1j_GIR         | Two-way ANOVA with Fisher's LSD test                                                                                                                                                   | ZT0-2:WT vs. ZT0-2:KO     | 0.0009   |
|                |                                                                                                                                                                                        | ZT6-8:WT vs. ZT6-8:KO     | 0.0018   |
|                |                                                                                                                                                                                        | ZT12-14:WT vs. ZT12-14:KO | < 0.0001 |
|                |                                                                                                                                                                                        | ZT0-2:WT vs. ZT6-8:WT     | 0.0253   |
|                |                                                                                                                                                                                        | ZT0-2:WT vs. ZT12-14:WT   | 0.6632   |
|                |                                                                                                                                                                                        | ZT6-8:WT vs. ZT12-14:WT   | 0.0099   |
| 1k_HGP         | Two-way ANOVA with Fisher's LSD test                                                                                                                                                   | ZT0-2:WT vs. ZT0-2:KO     | 0.0215   |
|                |                                                                                                                                                                                        | ZT6-8:WT vs. ZT6-8:KO     | 0.0017   |
|                |                                                                                                                                                                                        | ZT12-14:WT vs. ZT12-14:KO | 0.0001   |
|                |                                                                                                                                                                                        | ZT0-2:WT vs. ZT6-8:WT     | 0.0012   |
|                |                                                                                                                                                                                        | ZT0-2:WT vs. ZT12-14:WT   | 0.2819   |
|                |                                                                                                                                                                                        | ZT6-8:WT vs. ZT12-14:WT   | < 0.0001 |
| 1l_GDR         | Two-way ANOVA with Fisher's LSD test                                                                                                                                                   | ZT0-2:WT vs. ZT0-2:KO     | 0.0898   |
|                |                                                                                                                                                                                        | ZT6-8:WT vs. ZT6-8:KO     | 0.8612   |
|                |                                                                                                                                                                                        | ZT12-14:WT vs. ZT12-14:KO | 0.1216   |
|                |                                                                                                                                                                                        | ZT0-2:WT vs. ZT6-8:WT     | 0.1896   |
|                |                                                                                                                                                                                        | ZT0-2:WT vs. ZT12-14:WT   | 0.4984   |
|                |                                                                                                                                                                                        | ZT6-8:WT vs. ZT12-14:WT   | 0.0548   |
| 1m_Basal HGP   | Two-way ANOVA with Fisher's LSD test                                                                                                                                                   | ZT0-2:WT vs. ZT0-2:KO     | 0.7985   |
|                |                                                                                                                                                                                        | ZT6-8:WT vs. ZT6-8:KO     | 0.6466   |
|                |                                                                                                                                                                                        | ZT12-14:WT vs. ZT12-14:KO | 0.6645   |
|                |                                                                                                                                                                                        | ZT0-2:WT vs. ZT6-8:WT     | 0.2222   |
|                |                                                                                                                                                                                        | ZT0-2:WT vs. ZT12-14:WT   | 0.0178   |
|                |                                                                                                                                                                                        | ZT6-8:WT vs. ZT12-14:WT   | 0.1957   |
| 2a_firing      | Two-way ANOVA with Fisher's LSD test, n = 15 neurons from 3 WT mice and 16 neurons from 3 KO mice for ZT0-2, n = 17 neurons from 3 WT mice and 16 neurons from 3 KO mice at ZT6-8, n = | ZT0-2:WT vs. ZT0-2:KO     | 0.0002   |
|                |                                                                                                                                                                                        | ZT6-8:WT vs. ZT6-8:KO     | 0.2038   |
|                |                                                                                                                                                                                        | ZT12-14:WT vs. ZT12-14:KO | <0.0001  |
|                |                                                                                                                                                                                        | ZT0-2:WT vs. ZT6-8:WT     | 0.0659   |
|                |                                                                                                                                                                                        | ZT0-2:WT vs. ZT12-14:WT   | 0.0324   |

|              |                                                                                                                                                                                                                                                             |                           |          |
|--------------|-------------------------------------------------------------------------------------------------------------------------------------------------------------------------------------------------------------------------------------------------------------|---------------------------|----------|
|              | 12 neurons from 3 WT mice and 16 neurons from 3 KO mice for ZT12-14                                                                                                                                                                                         | ZT6-8:WT vs. ZT12-14:WT   | 0.0001   |
| 2b_RM        | Two-way ANOVA with Fisher's LSD test, n = 15 neurons from 3 WT mice and 18 neurons from 4 KO mice for ZT0-2, n = 18 neurons from 4 WT mice and 17 neurons from 3 KO mice for ZT6-8, n = 15 neurons from 3 WT mice and 17 neurons from 3 KO mice for ZT12-14 | ZT0-2:WT vs. ZT0-2:KO     | <0.0001  |
|              |                                                                                                                                                                                                                                                             | ZT6-8:WT vs. ZT6-8:KO     | 0.297    |
|              |                                                                                                                                                                                                                                                             | ZT12-14:WT vs. ZT12-14:KO | <0.0001  |
|              |                                                                                                                                                                                                                                                             | ZT0-2:WT vs. ZT6-8:WT     | 0.0002   |
|              |                                                                                                                                                                                                                                                             | ZT0-2:WT vs. ZT12-14:WT   | 0.6676   |
|              |                                                                                                                                                                                                                                                             | ZT6-8:WT vs. ZT12-14:WT   | <0.0001  |
| 2c_amp EPSC  | Two-way ANOVA with Fisher's LSD test, n = 15 neurons from 3 WT mice and 12 neurons from 3 KO mice for ZT0-2, n = 12 neurons from 3 WT mice and 11 neurons from 3 KO mice for ZT6-8, n = 12 neurons from 3 WT mice and 10 neurons from 3 KO mice for ZT12-14 | ZT0-2:WT vs. ZT0-2:KO     | <0.0001  |
|              |                                                                                                                                                                                                                                                             | ZT6-8:WT vs. ZT6-8:KO     | <0.0001  |
|              |                                                                                                                                                                                                                                                             | ZT12-14:WT vs. ZT12-14:KO | <0.0001  |
|              |                                                                                                                                                                                                                                                             | ZT0-2:WT vs. ZT6-8:WT     | 0.0161   |
|              |                                                                                                                                                                                                                                                             | ZT0-2:WT vs. ZT12-14:WT   | 0.5455   |
|              |                                                                                                                                                                                                                                                             | ZT6-8:WT vs. ZT12-14:WT   | 0.082    |
| 2d_freq EPSC | Two-way ANOVA with Fisher's LSD test, n = 15 neurons from 3 WT mice and 12 neurons from 3 KO mice for ZT0-2, n = 12 neurons from 3 WT mice and 11 neurons from 3 KO mice for ZT6-8, n = 12 neurons from 3 WT mice and 10 neurons from 3 KO mice for ZT12-14 | ZT0-2:WT vs. ZT0-2:KO     | 0.0013   |
|              |                                                                                                                                                                                                                                                             | ZT6-8:WT vs. ZT6-8:KO     | 0.0751   |
|              |                                                                                                                                                                                                                                                             | ZT12-14:WT vs. ZT12-14:KO | 0.0285   |
|              |                                                                                                                                                                                                                                                             | ZT0-2:WT vs. ZT6-8:WT     | 0.2538   |
|              |                                                                                                                                                                                                                                                             | ZT0-2:WT vs. ZT12-14:WT   | 0.4059   |
|              |                                                                                                                                                                                                                                                             | ZT6-8:WT vs. ZT12-14:WT   | 0.7663   |
| 2e_amp IPSC  | Two-way ANOVA with Fisher's LSD test, n = 11 neurons from 3 WT mice and 11 neurons from 3 KO mice for ZT0-2, n = 12 neurons from 3 WT mice and 11 neurons from 3 KO mice for ZT6-8, n = 12 neurons from 3 WT mice and 11 neurons from 3 KO mice for ZT12-14 | ZT0-2:WT vs. ZT0-2:KO     | 0.9566   |
|              |                                                                                                                                                                                                                                                             | ZT6-8:WT vs. ZT6-8:KO     | 0.9831   |
|              |                                                                                                                                                                                                                                                             | ZT12-14:WT vs. ZT12-14:KO | 0.0247   |
|              |                                                                                                                                                                                                                                                             | ZT0-2:WT vs. ZT6-8:WT     | 0.629    |
|              |                                                                                                                                                                                                                                                             | ZT0-2:WT vs. ZT12-14:WT   | 0.002    |
|              |                                                                                                                                                                                                                                                             | ZT6-8:WT vs. ZT12-14:WT   | 0.0068   |
| 2f_freq IPSC | Two-way ANOVA with Fisher's LSD test, n = 11 neurons from 3 WT mice and 11 neurons from 3 KO mice for ZT0-2, n = 12 neurons from 3 WT mice and 11 neurons from 3 KO mice for ZT6-8, n = 12 neurons from 3 WT mice and 11 neurons from 3 KO mice for ZT12-14 | ZT0-2:WT vs. ZT0-2:KO     | 0.0124   |
|              |                                                                                                                                                                                                                                                             | ZT6-8:WT vs. ZT6-8:KO     | 0.9079   |
|              |                                                                                                                                                                                                                                                             | ZT12-14:WT vs. ZT12-14:KO | 0.062    |
|              |                                                                                                                                                                                                                                                             | ZT0-2:WT vs. ZT6-8:WT     | 0.0015   |
|              |                                                                                                                                                                                                                                                             | ZT0-2:WT vs. ZT12-14:WT   | 0.3055   |
|              |                                                                                                                                                                                                                                                             | ZT6-8:WT vs. ZT12-14:WT   | 0.0224   |
| 2h_Nr1d1     | Two-way ANOVA with Fisher's LSD test                                                                                                                                                                                                                        | ZT0:WT vs. ZT0:KO         | 0.3608   |
|              |                                                                                                                                                                                                                                                             | ZT6:WT vs. ZT6:KO         | <0.0001  |
|              |                                                                                                                                                                                                                                                             | ZT12:WT vs. ZT12:KO       | 0.4618   |
|              |                                                                                                                                                                                                                                                             | ZT0:WT vs. ZT6:WT         | <0.0001  |
|              |                                                                                                                                                                                                                                                             | ZT0:WT vs. ZT12:WT        | 0.2847   |
|              |                                                                                                                                                                                                                                                             | ZT6:WT vs. ZT12:WT        | <0.0001  |
| 2i_Nr1d2     | Two-way ANOVA with Fisher's LSD test                                                                                                                                                                                                                        | ZT0:WT vs. ZT0:KO         | 0.2351   |
|              |                                                                                                                                                                                                                                                             | ZT6:WT vs. ZT6:KO         | <0.0001  |
|              |                                                                                                                                                                                                                                                             | ZT12:WT vs. ZT12:KO       | 0.3303   |
|              |                                                                                                                                                                                                                                                             | ZT0:WT vs. ZT6:WT         | <0.0001  |
|              |                                                                                                                                                                                                                                                             | ZT0:WT vs. ZT12:WT        | 0.3593   |
|              |                                                                                                                                                                                                                                                             | ZT6:WT vs. ZT12:WT        | <0.0001  |
| 2j_Rgs16     | Two-way ANOVA with Fisher's LSD test                                                                                                                                                                                                                        | ZT0:WT vs. ZT0:KO         | < 0.0001 |
|              |                                                                                                                                                                                                                                                             | ZT6:WT vs. ZT6:KO         | 0.3071   |
|              |                                                                                                                                                                                                                                                             | ZT12:WT vs. ZT12:KO       | 0.0407   |
|              |                                                                                                                                                                                                                                                             | ZT0:WT vs. ZT6:WT         | 0.0004   |

|                          |                                                                                                            |                            |                                      |
|--------------------------|------------------------------------------------------------------------------------------------------------|----------------------------|--------------------------------------|
|                          |                                                                                                            | ZT0:WT vs. ZT12:WT         | 0.4171                               |
|                          |                                                                                                            | ZT6:WT vs. ZT12:WT         | < 0.0001                             |
| 2k_Takusan               | Two-way ANOVA with Fisher's LSD test                                                                       | ZT0:WT vs. ZT0:KO          | < 0.0001                             |
|                          |                                                                                                            | ZT6:WT vs. ZT6:KO          | 0.0033                               |
|                          |                                                                                                            | ZT12:WT vs. ZT12:KO        | < 0.0001                             |
|                          |                                                                                                            | ZT0:WT vs. ZT6:WT          | 0.0097                               |
|                          |                                                                                                            | ZT0:WT vs. ZT12:WT         | 0.7734                               |
|                          |                                                                                                            | ZT6:WT vs. ZT12:WT         | 0.0193                               |
|                          |                                                                                                            | 3b_M3 ZT14 CNO             | Two-way ANOVA with Holm-Sidak's test |
| mCherry vs hM3Dq 15 min  | 0.959                                                                                                      |                            |                                      |
| mCherry vs hM3Dq 30 min  | < 0.0001                                                                                                   |                            |                                      |
| mCherry vs hM3Dq 60 min  | < 0.0001                                                                                                   |                            |                                      |
| mCherry vs hM3Dq 90 min  | 0.0595                                                                                                     |                            |                                      |
| mCherry vs hM3Dq 120 min | 0.8553                                                                                                     |                            |                                      |
| 3e_M4_GTT<br>ZT14 wo CNO | Two-way ANOVA with Holm-Sidak's test                                                                       | WT vs KO 0 min             | 0.5598                               |
|                          |                                                                                                            | WT vs KO 15 min            | 0.0265                               |
|                          |                                                                                                            | WT vs KO 30 min            | < 0.0001                             |
|                          |                                                                                                            | WT vs KO 60 min            | < 0.0001                             |
|                          |                                                                                                            | WT vs KO 90 min            | 0.0265                               |
|                          |                                                                                                            | WT vs KO 120 min           | 0.2664                               |
| 3g_M4 PTT ZT14<br>wo CNO | Two-way ANOVA with Holm-Sidak's<br>multiple comparisons test                                               | WT vs KO 0 min             | 0.5367                               |
|                          |                                                                                                            | WT vs KO 15 min            | 0.0959                               |
|                          |                                                                                                            | WT vs KO 30 min            | 0.0017                               |
|                          |                                                                                                            | WT vs KO 60 min            | 0.0157                               |
|                          |                                                                                                            | WT vs KO 90 min            | 0.3134                               |
|                          |                                                                                                            | WT vs KO 120 min           | 0.3134                               |
| 3k_DoxZT0_GTT<br>ZT14    | Two-way ANOVA with Holm-Sidak's<br>multiple comparisons test                                               | Control vs iRev-erb 0 min  | 0.5838                               |
|                          |                                                                                                            | Control vs iRev-erb 15 min | 0.0002                               |
|                          |                                                                                                            | Control vs iRev-erb 30 min | < 0.0001                             |
|                          |                                                                                                            | Control vs iRev-erb 60 min | < 0.0001                             |
|                          |                                                                                                            | Control vs iRev-erb 90 min | 0.5838                               |
|                          |                                                                                                            | Control vs iRev-erb120 min | 0.9124                               |
| 4b_CGM                   | Two-way ANOVA with Holm-Sidak's<br>multiple comparisons test (DP- vs. DP+<br>at the indicated time points) | -2                         | 0.9941                               |
|                          |                                                                                                            | -1.91667                   | 0.9941                               |
|                          |                                                                                                            | -1.83333                   | 0.9941                               |
|                          |                                                                                                            | -1.75                      | 0.9941                               |
|                          |                                                                                                            | -1.66667                   | 0.9941                               |
|                          |                                                                                                            | -1.58333                   | 0.9941                               |
|                          |                                                                                                            | -1.5                       | 0.9941                               |
|                          |                                                                                                            | -1.41667                   | 0.9941                               |
|                          |                                                                                                            | -1.33333                   | 0.9935                               |
|                          |                                                                                                            | -1.25                      | 0.9883                               |
|                          |                                                                                                            | -1.16667                   | 0.9855                               |
|                          |                                                                                                            | -1.08333                   | 0.9636                               |
|                          |                                                                                                            | -1                         | 0.9855                               |
|                          |                                                                                                            | -0.91667                   | 0.9855                               |
| -0.83333                 | 0.988                                                                                                      |                            |                                      |

|          |          |
|----------|----------|
| -0.75    | 0.9941   |
| -0.66667 | 0.9941   |
| -0.58333 | 0.9941   |
| -0.5     | 0.9941   |
| -0.41667 | 0.9941   |
| -0.33333 | 0.9941   |
| -0.25    | 0.9941   |
| -0.16667 | 0.9941   |
| -0.08333 | 0.9935   |
| 0        | 0.9721   |
| 0.083333 | 0.9721   |
| 0.166667 | 0.9138   |
| 0.25     | 0.7865   |
| 0.333333 | 0.6772   |
| 0.416667 | 0.4055   |
| 0.5      | 0.2299   |
| 0.583333 | 0.1183   |
| 0.666667 | 0.0977   |
| 0.75     | 0.0571   |
| 0.833333 | 0.0484   |
| 0.916667 | 0.019    |
| 1        | 0.0145   |
| 1.083333 | 0.008    |
| 1.166667 | 0.0048   |
| 1.25     | 0.0025   |
| 1.333333 | 0.0015   |
| 1.416667 | 0.0005   |
| 1.5      | 0.0005   |
| 1.583333 | 0.0004   |
| 1.666667 | 0.0002   |
| 1.75     | < 0.0001 |
| 1.833333 | < 0.0001 |
| 1.916667 | < 0.0001 |
| 2        | < 0.0001 |
| 2.083333 | < 0.0001 |
| 2.166667 | < 0.0001 |
| 2.25     | < 0.0001 |
| 2.333333 | < 0.0001 |
| 2.416667 | < 0.0001 |
| 2.5      | < 0.0001 |
| 2.583333 | < 0.0001 |
| 2.666667 | 0.0002   |
| 2.75     | 0.0007   |
| 2.833333 | 0.0037   |
| 2.916667 | 0.0092   |
| 3        | 0.0118   |
| 3.083333 | 0.0283   |

|                                        |                                                           |                         |          |
|----------------------------------------|-----------------------------------------------------------|-------------------------|----------|
|                                        |                                                           | 3.166667                | 0.0845   |
|                                        |                                                           | 3.25                    | 0.1462   |
|                                        |                                                           | 3.333333                | 0.2976   |
|                                        |                                                           | 3.416667                | 0.4319   |
|                                        |                                                           | 3.5                     | 0.6953   |
|                                        |                                                           | 3.583333                | 0.8956   |
|                                        |                                                           | 3.666667                | 0.9865   |
|                                        |                                                           | 3.75                    | 0.9941   |
|                                        |                                                           | 3.833333                | 0.9941   |
|                                        |                                                           | 3.916667                | 0.9941   |
|                                        |                                                           | 4                       | 0.9941   |
| 4g_Rev-erba                            | Two-way ANOVA with Holm-Sidak's multiple comparisons test | 7am DP- vs. DP+         | 0.8585   |
|                                        |                                                           | 1pm DP- vs. DP+         | 0.8585   |
|                                        |                                                           | 7pm DP- vs. DP+         | 0.0454   |
|                                        |                                                           | 1am DP- vs. DP+         | 0.8257   |
| 4h_Rev-erbb                            | Two-way ANOVA with Holm-Sidak's multiple comparisons test | 7am DP- vs. DP+         | 0.9326   |
|                                        |                                                           | 1pm DP- vs. DP+         | 0.7803   |
|                                        |                                                           | 7pm DP- vs. DP+         | 0.0408   |
|                                        |                                                           | 1am DP- vs. DP+         | 0.1355   |
| Extended Data 1c                       | Two-sided student's t-test                                | KO vs. WT               | <0.0001  |
| Extended Data 1g                       | Two-sided student's t-test                                | KO vs. WT               | <0.0001  |
| Extended Data 2b_food for 6hr fasting  | Two-way ANOVA with Fisher's LSD test                      | ZT18-0:WT vs. ZT18-0:KO | 0.6608   |
|                                        |                                                           | ZT0-6:WT vs. ZT0-6:KO   | 0.8107   |
|                                        |                                                           | ZT6-12:WT vs. ZT6-12:KO | 0.8107   |
|                                        |                                                           | ZT18-0:WT vs. ZT0-6:WT  | < 0.0001 |
|                                        |                                                           | ZT18-0:WT vs. ZT6-12:WT | 0.0012   |
|                                        |                                                           | ZT0-6:WT vs. ZT6-12:WT  | 0.1456   |
| Extended Data 2c_food for 12hr fasting | Two-way ANOVA with Fisher's LSD test                      | ZT12-0:WT vs. ZT12-0:KO | 0.5897   |
|                                        |                                                           | ZT18-6:WT vs. ZT18-6:KO | 0.9174   |
|                                        |                                                           | ZT0-12:WT vs. ZT0-12:KO | 0.8037   |
|                                        |                                                           | ZT12-0:WT vs. ZT18-6:WT | 0.0024   |
|                                        |                                                           | ZT12-0:WT vs. ZT0-12:WT | < 0.0001 |
|                                        |                                                           | ZT18-6:WT vs. ZT0-12:WT | 0.069    |
| Extended Data 2d_glucose               | Two-way ANOVA with Fisher's LSD test                      | ZT0:WT vs. ZT0:KO       | 0.0375   |
|                                        |                                                           | ZT6:WT vs. ZT6:KO       | 0.414    |
|                                        |                                                           | ZT12:WT vs. ZT12:KO     | 0.7979   |
|                                        |                                                           | ZT18:WT vs. ZT18:KO     | 0.4257   |
| Extended Data 2g_Corticosterone        | Two-way ANOVA with Fisher's LSD test                      | ZT0:WT vs. ZT0:KO       | 0.4436   |
|                                        |                                                           | ZT6:WT vs. ZT6:KO       | 0.6346   |
|                                        |                                                           | ZT12:WT vs. ZT12:KO     | < 0.0001 |
|                                        |                                                           | ZT18:WT vs. ZT18:KO     | 0.0643   |
| Extended Data 2h_GLP-1                 | Two-way ANOVA with Fisher's LSD test                      | ZT0:WT vs. ZT0:KO       | 0.0001   |
|                                        |                                                           | ZT6:WT vs. ZT6:KO       | 0.0883   |
|                                        |                                                           | ZT12:WT vs. ZT12:KO     | 0.1006   |
|                                        |                                                           | ZT18:WT vs. ZT18:KO     | 0.0003   |
| Extended Data 2i_GH                    | Two-way ANOVA with Fisher's LSD test                      | ZT0:WT vs. ZT0:KO       | 0.8875   |
|                                        |                                                           | ZT6:WT vs. ZT6:KO       | 0.5553   |

|                             |                                      |                                        |                                      |
|-----------------------------|--------------------------------------|----------------------------------------|--------------------------------------|
|                             |                                      | ZT12:WT vs. ZT12:KO                    | 0.0063                               |
|                             |                                      | ZT18:WT vs. ZT18:KO                    | 0.3708                               |
| Extended Data<br>2k_GTT     | Two-way ANOVA with Holm-Sidak's test | WT vs KO 0 min                         | 0.7532                               |
|                             |                                      | WT vs KO 15 min                        | 0.0003                               |
|                             |                                      | WT vs KO 30 min                        | 0.0154                               |
|                             |                                      | WT vs KO 60 min                        | 0.1755                               |
|                             |                                      | WT vs KO 90 min                        | 0.7532                               |
|                             |                                      | WT vs KO 120 min                       | 0.7532                               |
|                             |                                      | Extended Data<br>2o_HGP<br>suppression | Two-way ANOVA with Fisher's LSD test |
| ZT6-8:WT vs. ZT6-8:KO       | 0.0015                               |                                        |                                      |
| ZT12-14:WT vs. ZT12-14:KO   | 0.0002                               |                                        |                                      |
| ZT0-2:WT vs. ZT6-8:WT       | 0.0026                               |                                        |                                      |
| ZT0-2:WT vs. ZT12-14:WT     | 0.1059                               |                                        |                                      |
| ZT6-8:WT vs. ZT12-14:WT     | < 0.0001                             |                                        |                                      |
| Extended Data<br>3c_GTT     | Two-way ANOVA with Holm-Sidak's test | WT vs KO 0 min                         | 0.8045                               |
|                             |                                      | WT vs KO 15 min                        | 0.005                                |
|                             |                                      | WT vs KO 30 min                        | 0.0038                               |
|                             |                                      | WT vs KO 60 min                        | 0.0009                               |
|                             |                                      | WT vs KO 90 min                        | 0.0374                               |
|                             |                                      | WT vs KO 120 min                       | 0.6857                               |
| Extended Data<br>3e_ITT     | Two-way ANOVA with Holm-Sidak's test | WT vs KO 0 min                         | 0.0003                               |
|                             |                                      | WT vs KO 15 min                        | < 0.0001                             |
|                             |                                      | WT vs KO 30 min                        | < 0.0001                             |
|                             |                                      | WT vs KO 60 min                        | 0.015                                |
|                             |                                      | WT vs KO 90 min                        | 0.0005                               |
|                             |                                      | WT vs KO 120 min                       | < 0.0001                             |
| Extended Data<br>3h_glucose | Two-way ANOVA with Fisher's LSD test | 0:WT vs. 0:KO                          | 0.7175                               |
|                             |                                      | 5:WT vs. 5:KO                          | 0.2068                               |
|                             |                                      | 10:WT vs. 10:KO                        | 0.0013                               |
|                             |                                      | 15:WT vs. 15:KO                        | < 0.0001                             |
| Extended Data<br>3i_glucose | Two-way ANOVA with Fisher's LSD test | ZT0:WT vs. ZT0:KO                      | 0.0325                               |
|                             |                                      | ZT6:WT vs. ZT6:KO                      | 0.0467                               |
|                             |                                      | ZT12:WT vs. ZT12:KO                    | 0.0082                               |
|                             |                                      | ZT18:WT vs. ZT18:KO                    | 0.0081                               |
| Extended Data<br>4a_VIP     | One-way ANOVA with Tukey post-test   | SCN vs. LH                             | <0.0001                              |
|                             |                                      | SCN vs. PVN                            | <0.0001                              |
|                             |                                      | SCN vs. VMH                            | <0.0001                              |
|                             |                                      | SCN vs. ARC                            | <0.0001                              |
| Extended Data<br>4b_Pmch    | One-way ANOVA with Tukey post-test   | SCN vs. LH                             | <0.0001                              |
|                             |                                      | LH vs. PVN                             | <0.0001                              |
|                             |                                      | LH vs. VMH                             | <0.0001                              |
|                             |                                      | LH vs. ARC                             | <0.0001                              |
| Extended Data<br>4c_CRF     | One-way ANOVA with Tukey post-test   | SCN vs. PVN                            | <0.0001                              |
|                             |                                      | LH vs. PVN                             | <0.0001                              |
|                             |                                      | PVN vs. VMH                            | <0.0001                              |
|                             |                                      | PVN vs. ARC                            | <0.0001                              |
|                             | One-way ANOVA with Tukey post-test   | SCN vs. VMH                            | <0.0001                              |

|                           |                                      |                     |         |
|---------------------------|--------------------------------------|---------------------|---------|
| Extended Data<br>4d_Rfrp  |                                      | LH vs. VMH          | <0.0001 |
|                           |                                      | PVN vs. VMH         | <0.0001 |
|                           |                                      | VMH vs. ARC         | <0.0001 |
| Extended Data<br>4e_Pomc1 | One-way ANOVA with Tukey post-test   | SCN vs. ARC         | <0.0001 |
|                           |                                      | LH vs. ARC          | <0.0001 |
|                           |                                      | PVN vs. ARC         | <0.0001 |
|                           |                                      | VMH vs. ARC         | <0.0001 |
| Extended Data<br>4f_Nr1d1 | Two-sided student's t-test           | SCN: KO vs. WT      | 0.0004  |
|                           |                                      | LH: KO vs. WT       | 0.0048  |
|                           |                                      | PVN: KO vs. WT      | 0.3442  |
|                           |                                      | VMH: KO vs. WT      | 0.1244  |
|                           |                                      | ARC: KO vs. WT      | 0.4985  |
|                           |                                      | Liver: KO vs. WT    | 0.6002  |
| Extended Data<br>4g_Nr1d2 | Two-sided student's t-test           | SCN: KO vs. WT      | <0.0001 |
|                           |                                      | LH: KO vs. WT       | 0.0007  |
|                           |                                      | PVN: KO vs. WT      | 0.1053  |
|                           |                                      | VMH: KO vs. WT      | 0.0826  |
|                           |                                      | ARC: KO vs. WT      | 0.2370  |
|                           |                                      | Liver: KO vs. WT    | 0.2201  |
| Extended Data<br>4h_BMAL1 | Two-sided student's t-test           | SCN: KO vs. WT      | 0.0092  |
|                           |                                      | LH: KO vs. WT       | 0.0070  |
|                           |                                      | PVN: KO vs. WT      | 0.6281  |
|                           |                                      | VMH: KO vs. WT      | 0.5381  |
|                           |                                      | ARC: KO vs. WT      | 0.3627  |
|                           |                                      | Liver: KO vs. WT    | 0.1097  |
| Extended Data<br>4i_Npas2 | Two-sided student's t-test           | SCN: KO vs. WT      | 0.0304  |
|                           |                                      | LH: KO vs. WT       | 0.2737  |
|                           |                                      | PVN: KO vs. WT      | 0.5182  |
|                           |                                      | VMH: KO vs. WT      | 0.6693  |
|                           |                                      | ARC: KO vs. WT      | 0.2593  |
|                           |                                      | Liver: KO vs. WT    | 0.2153  |
| Extended Data<br>5h_Nr1d1 | Two-way ANOVA with Fisher's LSD test | ZT0:WT vs. ZT0:KO   | <0.0001 |
|                           |                                      | ZT6:WT vs. ZT6:KO   | 0.0035  |
|                           |                                      | ZT12:WT vs. ZT12:KO | 0.1251  |
|                           |                                      | ZT0:WT vs. ZT6:WT   | 0.0042  |
|                           |                                      | ZT0:WT vs. ZT12:WT  | 0.0661  |
|                           |                                      | ZT6:WT vs. ZT12:WT  | <0.0001 |
| Extended Data<br>5i_Nr1d2 | Two-way ANOVA with Fisher's LSD test | ZT0:WT vs. ZT0:KO   | 0.0003  |
|                           |                                      | ZT6:WT vs. ZT6:KO   | 0.0921  |
|                           |                                      | ZT12:WT vs. ZT12:KO | 0.1814  |
|                           |                                      | ZT0:WT vs. ZT6:WT   | 0.0013  |
|                           |                                      | ZT0:WT vs. ZT12:WT  | 0.0364  |
|                           |                                      | ZT6:WT vs. ZT12:WT  | <0.0001 |
| Extended Data<br>5j_BMAL1 | Two-way ANOVA with Fisher's LSD test | ZT0:WT vs. ZT0:KO   | 0.5385  |
|                           |                                      | ZT6:WT vs. ZT6:KO   | 0.8035  |
|                           |                                      | ZT12:WT vs. ZT12:KO | <0.0001 |
|                           |                                      | ZT0:WT vs. ZT6:WT   | 0.9873  |

|                               |                                      |                         |          |
|-------------------------------|--------------------------------------|-------------------------|----------|
|                               |                                      | ZT0:WT vs. ZT12:WT      | 0.0163   |
|                               |                                      | ZT6:WT vs. ZT12:WT      | 0.0157   |
| Extended Data<br>5k_Npas2     | Two-way ANOVA with Fisher's LSD test | ZT0:WT vs. ZT0:KO       | <0.0001  |
|                               |                                      | ZT6:WT vs. ZT6:KO       | 0.0035   |
|                               |                                      | ZT12:WT vs. ZT12:KO     | 0.1822   |
|                               |                                      | ZT0:WT vs. ZT6:WT       | 0.0549   |
|                               |                                      | ZT0:WT vs. ZT12:WT      | 0.0768   |
|                               |                                      | ZT6:WT vs. ZT12:WT      | 0.0006   |
| Extended Data<br>5m_RNAscope  | Two-way ANOVA with Fisher's LSD test | WT:ZT4 vs. WT:ZT16      | 0.0028   |
|                               |                                      | WT:ZT4 vs. KO:ZT4       | 0.5841   |
|                               |                                      | WT:ZT16 vs. KO:ZT16     | 0.012    |
| Extended Data<br>5o_ISH       | Two-way ANOVA with Fisher's LSD test | WT:ZT4 vs. WT:ZT16      | 0.0075   |
|                               |                                      | WT:ZT4 vs. KO:ZT4       | 0.0053   |
|                               |                                      | WT:ZT16 vs. KO:ZT16     | 0.0008   |
| Extended Data<br>5q_ChIP-qPCR | Two-way ANOVA with Fisher's LSD test | Control: ZT21 vs. ZT9   | 0.9796   |
|                               |                                      | Rgs16: ZT21 vs. ZT9     | 0.0047   |
|                               |                                      | Gm10406: ZT21 vs. ZT9   | 0.0058   |
|                               |                                      | Gm2897: ZT21 vs. ZT9    | 0.0372   |
|                               |                                      | Gm3411: ZT21 vs. ZT9    | 0.0004   |
|                               |                                      | Npas2: ZT21 vs. ZT9     | 0.0016   |
|                               |                                      | Bmal1: ZT21 vs. ZT9     | <0.0001  |
| Extended Data<br>6b_GTT_ZT6   | Two-way ANOVA with Holm-Sidak's test | GFP vs. Rgs16 0 min     | 0.9592   |
|                               |                                      | GFP vs. Takusan 0 min   | 0.9736   |
|                               |                                      | GFP vs. Rgs16 15 min    | 0.0089   |
|                               |                                      | GFP vs. Takusan 15 min  | 0.0052   |
|                               |                                      | GFP vs. Rgs16 30 min    | < 0.0001 |
|                               |                                      | GFP vs. Takusan 30 min  | < 0.0001 |
|                               |                                      | GFP vs. Rgs16 60 min    | 0.4989   |
|                               |                                      | GFP vs. Takusan 60 min  | 0.2      |
|                               |                                      | GFP vs. Rgs16 90 min    | 0.5859   |
|                               |                                      | GFP vs. Takusan 90 min  | 0.2271   |
|                               |                                      | GFP vs. Rgs16 120 min   | 0.6244   |
|                               |                                      | GFP vs. Takusan 120 min | 0.6244   |
| Extended Data<br>6c_GTT_ZT12  | Two-way ANOVA with Holm-Sidak's test | GFP vs. Rgs16 0 min     | 0.9697   |
|                               |                                      | GFP vs. Takusan 0 min   | 0.9697   |
|                               |                                      | GFP vs. Rgs16 15 min    | < 0.0001 |
|                               |                                      | GFP vs. Takusan 15 min  | < 0.0001 |
|                               |                                      | GFP vs. Rgs16 30 min    | < 0.0001 |
|                               |                                      | GFP vs. Takusan 30 min  | < 0.0001 |
|                               |                                      | GFP vs. Rgs16 60 min    | < 0.0001 |
|                               |                                      | GFP vs. Takusan 60 min  | 0.0006   |
|                               |                                      | GFP vs. Rgs16 90 min    | 0.6603   |
|                               |                                      | GFP vs. Takusan 90 min  | 0.3222   |
|                               |                                      | GFP vs. Rgs16 120 min   | 0.9916   |
|                               |                                      | GFP vs. Takusan 120 min | 0.894    |
| Extended Data<br>6e_ITT_ZT14  | Two-way ANOVA with Holm-Sidak's test | GFP vs. Rgs16 0 min     | > 0.9999 |
|                               |                                      | GFP vs. Takusan 0 min   | > 0.9999 |



|                             |                            |                               |           |
|-----------------------------|----------------------------|-------------------------------|-----------|
|                             |                            | GFP vs. Rgs16 15 min          | 0.2091    |
|                             |                            | GFP vs. Takusan 15 min        | 0.0102    |
|                             |                            | GFP vs. Rgs16 30 min          | 0.0142    |
|                             |                            | GFP vs. Takusan 30 min        | < 0.0001  |
|                             |                            | GFP vs. Rgs16 60 min          | 0.0005    |
|                             |                            | GFP vs. Takusan 60 min        | < 0.0001  |
|                             |                            | GFP vs. Rgs16 90 min          | 0.3282    |
|                             |                            | GFP vs. Takusan 90 min        | 0.113     |
|                             |                            | GFP vs. Rgs16 120 min         | 0.822     |
|                             |                            | GFP vs. Takusan 120 min       | 0.1683    |
| Extended Data<br>8e_RT-qPCR | Two-sided student's t-test | Bmal1: Control vs. iRev-erb   | 0.0739978 |
|                             |                            | Clock: Control vs. iRev-erb   | 0.364558  |
|                             |                            | Npas2: Control vs. iRev-erb   | 0.0089462 |
|                             |                            | Rgs16: Control vs. iRev-erb   | 0.0024738 |
|                             |                            | Takusan: Control vs. iRev-erb | 0.002927  |

**Supplementary Table 2.** Primer sequences for RT-qPCR and ChIP-qPCR.**RT-qPCR (mouse)**

|                          |                            |                          |
|--------------------------|----------------------------|--------------------------|
| Rev-erba (span loxP)     | TACAAGTGGCCATGGAAGAC       | CCCACACACCTTACACAGTAG    |
| Rev-erbβ (span loxP)     | TCGATGGTGTCTGAAGAGTG       | CCCACAGACTTTACACAGTAGAA  |
| Rev-erba (not span loxP) | TACATTGGCTCTAGTGGCTCC      | CAGTAGGTGATGGTGGGAAGTA   |
| Rev-erbβ (not span loxP) | TGAACGCAGGAGGTGTGATTG      | GAGGACTGGAAGCTATTCTCAGA  |
| Rgs16                    | GGTACTTGCTACTCGCTTTTCC     | CAGCCGCGTCTTGA ACTCT     |
| α7-Takusan (GM10406)     | AGAGAAGTGCTGGAGGAAGA       | GCATTTCTCTGAGTCCCTTT     |
| Bmal1                    | CGCCGCTCTCTGTTCTGTAG       | GTGTCGAGAAACGTA CTCCATAG |
| Npas2                    | ATGTTTCGAGTGGAAAGGAGAC     | CAAGTGCATTAAAGGGCTGTG    |
| Vip                      | GA ACTTCAGCACCCCTAGACAG    | GAAGAGTATCAGGAATGCCAGG   |
| Pmch                     | GTCTGGCTGTAAAACCTTACCTC    | CCTGAGCATGTCAAATCTCTCC   |
| Crf                      | CCTCAGCCGGTTCTGATCC        | GCGGAAAAAGTTAGCCGCAG     |
| Rfrp                     | CTGATTTGCCACAGAAACCC       | CATCTGTTTCCACAAACGCTC    |
| Pomc1                    | GAGGTTAAGAGCAGTGA CTAAAGAG | AGAATCTCGGCATCTTCCAC     |
| 18S                      | AGTCCCTGCCCTTTGTACACA      | CGATCCGAGGGCCTCACTA      |

**RT-qPCR (human)**

|          |                         |                        |
|----------|-------------------------|------------------------|
| Rev-erba | CCTTGGAGACTTCCCGCTTC    | ATTTACAAGAAGGCTCAGGGGG |
| Rev-erbβ | TCATGCTTGCGAAGGCTGTAA   | CGCTTAGGAATACGACCAAACC |
| PER2     | GCGTGTTCCACAGTTTCACC    | GCGGATTTCA TTCTCGTGCC  |
| PER3     | TTTGTGAATCCCTGGAGCCG    | TCATTTAGTGGGCTCGTTCCG  |
| CLOCK    | TGCGAGGAACAATAGACCCAA   | ATGGCCTATGTGTGCGTTGTA  |
| BMAL1    | CATTAAGAGGTGCCACCAATCC  | TCATTCTGGCTGTAGTTGAGGA |
| 18S      | ATCACCATTATGCAGAATCCACG | GACCTGGCTGTATTTTCCATCC |

**ChIP-qPCR (mouse)**

|                                               |                      |                      |
|-----------------------------------------------|----------------------|----------------------|
| Bmal1                                         | AGCGGATTGGTCGGAAAGT  | ACCTCCGTCCCTGACCTACT |
| Npas2                                         | CTTGCCGATCCTTGACCCAT | CTCAGGTTACTGGGGACGTG |
| Rgs16                                         | CACTCTCTTATTGGTCGGCG | GTAGCAAGTACCAGGCTGCG |
| Takusan (GM10406)                             | CAGCCTGGGAGGAAATGGTG | CTTCCGGAACGGAACCTGG  |
| Takusan<br>(LOC100861615, or<br>NM_001270812) | TTCCATTCCGGAAGCGGTC  | GCACGGAAATGGTCCTCTCT |
| Takusan (Gm2897)                              | GGCTCACCTCTTGACCTCG  | GTCCTTGACCCTCGGAACAG |

**ISH probe for Takusan  
(Gm3500) (mouse)**

AAATTGGATATGAGGAAGATCAGCAATGACATGGAGGAAATGTGTGGAATCCTGAACCTTTACATGTAT  
GAGGATTTGAACTACAGGATGAACACTGAATTCAACATCATTAAATCACAACATGAGAAGACAATGTTGG  
ATATGAATAAAATGATCCAGTCCATAATTGGTTCCATGCAGTATTCCAAGGAACTGATAGAAGATAACTA  
TTCCTACAGCATTAAAGGAGGACCACCTCCTCCGTGAGTGC ACTCAACTCAACGAAAACGTAAGGATATT  
ACTGAATGAGAACAGAAGGCTGCTGGTGGAGCAGGCTGGCCATAAGTGTCTGTGGGGGAAGAAAAGA  
GGTTCTCTGAGGAGGCCAGGAAGTACATCTGTGTCCCAAGTGCCAAGGAACAGCAGT

### Supplementary Table 3. Inclusion and exclusion criteria for patient recruitment

---

#### Inclusion criteria

- 25 -70 years old
- Regular diet and sleep in the past two weeks before hospitalization. Patients wake up at 5:30 AM - 8:00 AM, have breakfast at 6:00 AM - 8:30 AM, have lunch at 11:00 AM - 13:30 PM, have dinner at 17:00 PM - 19:30 PM, and fall asleep at 21:00 PM - 23:30 PM.
- Type 2 diabetes according to the WHO criteria (1999) at the time of admission into the hospital
- Fingertip blood glucometer measurement with fasting glucose 90-180 mg/dL and postprandial glucose < 288 mg/dL with a fixed medication regimen when the study was started

#### Exclusion criteria

- Type 1 diabetes, gestational diabetes, monogenic diabetes, or cystic fibrosis-related diabetes
  - Nighttime hypoglycemia (glucose < 70 mg/dL) (Somogyi effect)
  - Acute complications of diabetes such as ketoacidosis or hyperosmolar hyperglycemic state
  - Acute infection
  - Pregnancy or lactation
  - Currently on glucocorticoids
  - Currently on continuous subcutaneous insulin infusion (insulin pump)
  - Poor control of hypertension (SBP  $\geq$  160 mmHg and/or DBP  $\geq$  100 mmHg with treatment)
  - Abnormal liver function with ALT or AST over twofold of the upper limit of the reference value
  - Abnormal renal function with eGFR < 60 mL/min/1.73 m<sup>2</sup>
  - Myocardial infarction, unstable angina pectoris, heart arrhythmia, heart failure, cerebrovascular accident, or severe cardiovascular diseases with sequelae in the past 6 months
  - Night shift, time-zones crossing, or other irregular sleep behaviors in the past 2 weeks
  - Less than 3 matched measurements from the fingertip glucometer readings and CGMs readings in a day (correlation coefficient < 0.79 between fingertip glucometer and CGM values) during the study
-

**Supplementary Table 4.** Characteristics of human subjects

|                                      | DP-<br>n = 16  | DP+<br>n = 11  | p                  |
|--------------------------------------|----------------|----------------|--------------------|
| Age (years)                          | 48.56 (3.00)   | 51.55 (3.03)   | 0.505 <sup>#</sup> |
| Sex ratio (males/females)            | 12/4           | 6/5            | 0.268 <sup>*</sup> |
| Duration of disease (years)          | 8.35 (1.69)    | 8.70 (2.23)    | 0.900 <sup>#</sup> |
| Body mass index (kg/m <sup>2</sup> ) | 27.73 (1.51)   | 25.93 (1.02)   | 0.381 <sup>#</sup> |
| Waist-to-hip ratio                   | 1.02 (0.06)    | 0.93 (0.02)    | 0.307 <sup>#</sup> |
| <b>Blood parameters</b>              |                |                |                    |
| Hemoglobin (g/L)                     | 141.93 (1.92)  | 134.91 (3.56)  | 0.072 <sup>#</sup> |
| Hematocrit (%)                       | 39.46 (3.25)   | 39.89 (1.11)   | 0.915 <sup>#</sup> |
| Fasting blood glucose (mg/dl)        | 133.11 (4.96)  | 135.93 (7.84)  | 0.752 <sup>#</sup> |
| Basal Insulin (μIU/ml)               | 12.95 (1.65)   | 9.73 (2.02)    | 0.226 <sup>#</sup> |
| C-Peptide (ng/ml)                    | 1.33 (0.19)    | 1.16 (0.14)    | 0.513 <sup>#</sup> |
| HbA1C (%)                            | 8.41 (0.39)    | 8.80 (0.54)    | 0.552 <sup>#</sup> |
| Total cholesterol (mmol/L)           | 4.59 (0.27)    | 4.66 (0.35)    | 0.860 <sup>#</sup> |
| Triglycerides (mmol/L)               | 1.87 (0.17)    | 1.92 (0.34)    | 0.890 <sup>#</sup> |
| HDL-C (mmol/L)                       | 1.06 (0.07)    | 1.09 (0.06)    | 0.772 <sup>#</sup> |
| LDL-C (mmol/L)                       | 2.94 (0.23)    | 3.00 (0.23)    | 0.860 <sup>#</sup> |
| Homocysteine (umol/l)                | 13.06 (1.23)   | 12.89 (1.07)   | 0.925 <sup>#</sup> |
| Uric acid (umol/l)                   | 336.75 (18.92) | 310.63 (14.51) | 0.322 <sup>#</sup> |
| <b>Fingertip blood glucose</b>       |                |                |                    |
| 7am (pre-breakfast) (mg/dl)          | 136.80 (5.36)  | 150.38 (9.06)  | 0.182 <sup>#</sup> |
| 11am (pre-lunch) (mg/dl)             | 135.79 (10.08) | 147.60 (9.96)  | 0.430 <sup>#</sup> |
| 5pm (pre-dinner) (mg/dl)             | 123.64 (7.12)  | 140.24(5.54)   | 0.102 <sup>#</sup> |
| 9pm (before bed) (mg/dl)             | 127.93 (4.98)  | 131.45 (7.72)  | 0.690 <sup>#</sup> |
| <b>Sleep</b>                         |                |                |                    |
| The time to fall asleep              | 23:09 (0:23)   | 22:46 (0:31)   | 0.556 <sup>#</sup> |
| The time to wake up                  | 6:08 (0:09)    | 6:04 (0:10)    | 0.806 <sup>#</sup> |
| Total sleep duration (min)           | 411.57 (22.48) | 429.17 (26.80) | 0.620 <sup>#</sup> |
| Light sleep duration (min)           | 298.56 (19.65) | 284.03 (18.95) | 0.614 <sup>#</sup> |
| Deep sleep duration (min)            | 105.72 (8.88)  | 134.25 (14.46) | 0.087 <sup>#</sup> |
| <b>Sleep (pre-hospital)</b>          |                |                |                    |
| The time to fall asleep              | 22:15 (0:10)   | 22:21 (0:12)   | 0.673 <sup>#</sup> |
| The time to wake up                  | 6:28 (0:08)    | 6:16 (0:10)    | 0.410 <sup>#</sup> |
| <b>Mealtime</b>                      |                |                |                    |
| Breakfast time                       | 7:27 (0:09)    | 7:11 (0:06)    | 0.218 <sup>#</sup> |
| Lunch time                           | 11:53 (0:05)   | 12:04 (0:13)   | 0.413 <sup>#</sup> |
| Dinner time                          | 17:50 (0:11)   | 17:56 (0:14)   | 0.765 <sup>#</sup> |
| <b>Mealtime (pre-hospital)</b>       |                |                |                    |
| Breakfast time                       | 7:31 (0:07)    | 7:27 (0:10)    | 0.714 <sup>#</sup> |
| Lunch time                           | 11:56 (0:02)   | 12:10 (0:08)   | 0.082 <sup>#</sup> |
| Dinner time                          | 18:21 (0:08)   | 18:30 (0:08)   | 0.487 <sup>#</sup> |
| <b>Activity</b>                      |                |                |                    |
| Step count                           | 6786 (640)     | 5912 (1457)    | 0.546 <sup>#</sup> |

|                                |               |              |                    |
|--------------------------------|---------------|--------------|--------------------|
| Walking distance (km)          | 4.43 (0.41)   | 3.87 (0.99)  | 0.562 <sup>#</sup> |
| <b>Medication usage</b>        |               |              |                    |
| Insulin (%)                    | 31.25 (5/16)  | 45.45 (5/11) | 0.453 <sup>*</sup> |
| Metformin (%)                  | 93.75 (15/16) | 81.82 (9/11) | 0.332 <sup>*</sup> |
| Sulfonylurea (%)               | 37.50 (6/16)  | 54.55 (6/11) | 0.381 <sup>*</sup> |
| Meglitinides (%)               | 6.25 (1/16)   | 0 (0/11)     | 0.398 <sup>*</sup> |
| α-glucosidase inhibitor (%)    | 68.75 (11/16) | 45.45 (5/11) | 0.226 <sup>*</sup> |
| DPP-4 inhibitor (%)            | 31.25 (5/16)  | 36.36 (4/11) | 0.782 <sup>*</sup> |
| SGLT2 inhibitor (%)            | 18.75 (3/16)  | 9.09 (1/11)  | 0.487 <sup>*</sup> |
| GLP-1 analogue (%)             | 6.25 (1/16)   | 9.09 (1/11)  | 0.782 <sup>*</sup> |
| Single drug (%)                | 12.5 (2/16)   | 9.09 (1/11)  | 0.782 <sup>*</sup> |
| Combination of two drugs (%)   | 18.75 (3/16)  | 27.27 (3/11) | 0.601 <sup>*</sup> |
| Combination of three drugs (%) | 37.50 (6/16)  | 36.36 (4/11) | 0.952 <sup>*</sup> |
| Combination of four drugs (%)  | 25 (4/16)     | 27.27 (3/11) | 0.895 <sup>*</sup> |
| Combination of five drugs (%)  | 6.25 (1/16)   | 0 (0/11)     | 0.398 <sup>*</sup> |

---

DP-, patients without dawn phenomenon.

DP+, patients with dawn phenomenon.

Data are expressed as mean (SEM).

<sup>#</sup>, two-sided student t-test; <sup>\*</sup>, chi-square test.

**Supplementary Table 5.** Cardiopulmonary Coupling-Polysomnography (CPC-PSG) of human subjects

|                                                | DP-<br>n = 10  | DP+<br>n = 8   | p     |
|------------------------------------------------|----------------|----------------|-------|
| <b>Sleep</b>                                   |                |                |       |
| Testing time (min)                             | 448.73 (13.96) | 392.98 (48.96) | 0.245 |
| Sleep onset latency (min)                      | 52.40 (7.81)   | 33.25 (10.45)  | 0.153 |
| Total sleep interval time (min)                | 396.55 (14.15) | 351.00 (43.94) | 0.296 |
| Total sleep time (min)                         | 311.00 (19.73) | 306.00 (39.01) | 0.905 |
| Stable sleep duration (min)                    | 50.60 (6.36)   | 44.06 (10.98)  | 0.596 |
| Unstable sleep duration (min)                  | 186.95 (14.06) | 194.19 (27.44) | 0.806 |
| REM duration (min)                             | 84.45 (7.56)   | 67.75 (8.55)   | 0.162 |
| Stable sleep duration (%)                      | 16.39 (1.61)   | 14.41 (2.78)   | 0.527 |
| Unstable sleep duration (%)                    | 60.56 (3.39)   | 63.44 (2.70)   | 0.532 |
| REM duration (%)                               | 27.60 (2.76)   | 22.14 (0.91)   | 0.108 |
| Total number of awakenings (n)                 | 26.40 (2.07)   | 16.14 (2.32)   | 0.005 |
| <b>Breathe</b>                                 |                |                |       |
| Apnea hypopnea index (times/hour)              | 6.56 (1.89)    | 4.74 (1.86)    | 0.509 |
| Total number of obstructive apnea (n)          | 8.75 (3.09)    | 2.50 (1.71)    | 0.119 |
| The maximum duration of obstructive apnea (s)  | 25.98 (7.22)   | 8.78 (4.75)    | 0.078 |
| Obstructive apnea index (times/hour)           | 1.65 (0.79)    | 0.59 (0.30)    | 0.269 |
| Total number of central apnea (n)              | 0.60 (0.27)    | 0 (0)          | 0.063 |
| The maximum duration of central apnea (s)      | 6.45 (2.78)    | 0 (0)          | 0.056 |
| Central apnea index (times/hour)               | 0.11 (0.05)    | 0 (0)          | 0.059 |
| Total number of mixed apnea (n)                | 1.00 (0.89)    | 0 (0)          | 0.369 |
| The maximum duration of mixed apnea (s)        | 6.78 (4.53)    | 0 (0)          | 0.202 |
| Mixed apnea index (times/hour)                 | 0.24 (0.22)    | 0 (0)          | 0.344 |
| Total number of all types of apnea (n)         | 10.35 (3.91)   | 2.50 (1.71)    | 0.111 |
| The maximum duration of all types of apnea (s) | 39.21 (11.87)  | 8.78 (4.75)    | 0.045 |
| Total number of hypopnea (n)                   | 37.60 (13.50)  | 28.14 (12.91)  | 0.634 |
| The maximum duration of hypopnea (s)           | 52.39 (10.47)  | 49.60 (12.36)  | 0.865 |
| Hypopnea index (times/hour)                    | 6.51 (2.05)    | 4.15 (1.85)    | 0.416 |
| <b>Snore</b>                                   |                |                |       |
| Number of snoring incidents (n)                | 60.60 (28.51)  | 10.88 (3.62)   | 0.142 |
| Average snoring time (s)                       | 23.68 (5.68)   | 25.31 (8.47)   | 0.871 |
| Total snoring time (min)                       | 30.86 (15.17)  | 4.88 (1.83)    | 0.149 |
| The ratio of sleeping time (%)                 | 8.36 (3.99)    | 2.66 (1.42)    | 0.240 |
| <b>Blood oxygen</b>                            |                |                |       |
| Mean vein oxygen of REM (%)                    | 96.30 (0.21)   | 96.38 (0.26)   | 0.826 |
| Mean vein oxygen of stable sleep (%)           | 96.10 (0.31)   | 96.38 (0.38)   | 0.579 |
| Mean vein oxygen of unstable sleep (%)         | 96.00 (0.26)   | 96.38 (0.26)   | 0.329 |
| Mean vein oxygen of total sleep time           | 95.90 (0.31)   | 96.38 (0.26)   | 0.279 |
| ODI of REM (times/hour)                        | 9.32 (2.44)    | 6.80 (2.00)    | 0.452 |
| ODI of stable sleep (times/hour)               | 2.45 (1.65)    | 0.91 (0.60)    | 0.437 |
| ODI of unstable sleep (times/hour)             | 12.12 (4.50)   | 6.39 (2.33)    | 0.310 |
| ODI of total sleep time (times/hour)           | 10.49 (3.42)   | 5.61 (2.06)    | 0.269 |

|                                              |                |                |       |
|----------------------------------------------|----------------|----------------|-------|
| MORT of REM (s)                              | 57.40 (30.59)  | 35.00 (17.39)  | 0.561 |
| MORT of stable sleep (times/hour)            | 3.30 (1.87)    | 1.50 (1.00)    | 0.443 |
| MORT of unstable sleep (times/hour)          | 31.80 (8.28)   | 38.75 (15.21)  | 0.677 |
| MORT of total sleep time (s)                 | 65.80 (29.79)  | 47.63 (16.62)  | 0.626 |
| MOS of REM (%)                               | 89.00 (1.23)   | 90.50 (1.51)   | 0.448 |
| MOS of stable sleep (%)                      | 94.00 (0.56)   | 94.50 (0.50)   | 0.525 |
| MOS of unstable sleep (%)                    | 85.30 (1.69)   | 88.13 (1.79)   | 0.270 |
| MOS of total sleep time (%)                  | 84.60 (1.62)   | 85.63 (1.61)   | 0.664 |
| <b>Heart rate</b>                            |                |                |       |
| Average heart rate of REM (bpm)              | 70.57 (2.56)   | 70.83 (6.77)   | 0.970 |
| Average heart rate of stable sleep (bpm)     | 67.89 (2.62)   | 70.61 (7.19)   | 0.704 |
| Average heart rate of unstable sleep (bpm)   | 69.91 (2.30)   | 71.08 (6.90)   | 0.863 |
| Average heart rate of total sleep time (bpm) | 70.83 (2.38)   | 71.98 (6.83)   | 0.865 |
| Minimum heart rate of REM (bpm)              | 60.20 (2.24)   | 64.38 (7.08)   | 0.546 |
| Minimum heart rate of stable sleep (bpm)     | 59.50 (2.10)   | 63.63 (7.13)   | 0.550 |
| Minimum heart rate of unstable sleep (bpm)   | 62.60 (2.39)   | 67.75 (7.53)   | 0.485 |
| Minimum heart rate of total sleep time (bpm) | 58.60 (2.08)   | 63.13 (7.00)   | 0.505 |
| Maximum heart rate of REM (bpm)              | 90.10 (3.09)   | 85.75 (5.21)   | 0.463 |
| Maximum heart rate of stable sleep (bpm)     | 91.10 (4.17)   | 87.38 (5.49)   | 0.590 |
| Maximum heart rate of unstable sleep (bpm)   | 76.80 (2.92)   | 75.63 (6.63)   | 0.864 |
| Maximum heart rate of total sleep time (bpm) | 108.00 (3.43)  | 102.38 (3.55)  | 0.275 |
| <b>Indicator of heart rate variability</b>   |                |                |       |
| The mean of the RR interval (ms)             | 856.12 (28.77) | 891.93 (84.33) | 0.666 |
| SDNN (ms)                                    | 94.12 (17.39)  | 69.15 (14.94)  | 0.306 |
| SDANN (ms)                                   | 53.13 (8.17)   | 43.01 (8.91)   | 0.416 |
| RMSSD (ms)                                   | 67.36 (20.18)  | 36.79 (8.12)   | 0.218 |
| PNN50 (%)                                    | 6.11 (2.29)    | 4.40 (2.56)    | 0.625 |

REM, Rapid eye movement.

ODI, oxygen desaturation index.

MORT, maximum oxygen reduction time.

MOS, Minimum oxygen saturation.

SDNN, the standard deviation of the RR interval for all cardiac sinus beats.

SDANN, the standard deviation of the interval mean.

RMSSD, the root mean square of the difference between adjacent RR intervals.

PNN50, the number of >50ms between adjacent periods accounted for the percentage of the total sinus cardiac beats.

P values were from two-sided student t-test.

**Supplementary Table 6.** Medications in patients

| Subject    | INS        | DMBG                                     | SU                             |             | M<br>G                    | α-GCase<br>inhibitor | DPP-4 inhibitor |             | SGLT2<br>inhibitor |              | GLP<br>-1a       |
|------------|------------|------------------------------------------|--------------------------------|-------------|---------------------------|----------------------|-----------------|-------------|--------------------|--------------|------------------|
|            |            |                                          | Glic                           | Glim        |                           |                      | Sita            | Sax<br>a    | Empa               | Dap<br>a     |                  |
| <b>DP-</b> | 1          | -                                        | 500mg tid                      | -           | -                         | -                    | 50mg tid        | -           | -                  | -            | -                |
|            | 2          | -                                        | 1000mg<br>bid                  | 60m<br>g qd | -                         | -                    | 50mg tid        | 100mg<br>qd | -                  | -            | -                |
|            | 3          | -                                        | 1000mg<br>bid                  | -           | -                         | -                    | 100mg<br>tid    | 100mg<br>qd | -                  | -            | -                |
|            | 4          | 18IU qn                                  | 500mg tid                      | -           | -                         | -                    | 100mg<br>tid    | 100mg<br>qd | -                  | -            | -                |
|            | 5          | 24IU qn                                  | 500mg qid                      | -           | -                         | 2m<br>g<br>tid       | 100mg<br>tid    | -           | -                  | -            | -                |
|            | 6          | -                                        | 500mg tid                      | 60m<br>g qd | -                         | -                    | 50mg tid        | -           | -                  | -            | -                |
|            | 7          | 20IU 8am                                 | 500mg<br>8am;<br>1000mg<br>4pm | 30m<br>g qd | -                         | -                    | 50mg tid        | -           | 5m<br>g<br>qd      | -            | -                |
|            | 8          | 8IU 8am;<br>8IU<br>11am;<br>26IU<br>10pm | 1000mg<br>bid                  | -           | -                         | -                    | -               | 100mg<br>qd | -                  | 100m<br>g qd | -                |
|            | 9          | 22IU<br>8am;<br>6IU<br>11am;<br>14IU 4pm | -                              | -           | -                         | -                    | -               | -           | -                  | -            | -                |
|            | 10         | -                                        | 500mg tid                      | -           | 2mg<br>bid                | -                    | 50mg id         | -           | -                  | -            | -                |
|            | 11         | -                                        | 500mg bid                      | -           | 2mg<br>8am;<br>1mg<br>4pm | -                    | -               | -           | -                  | -            | -                |
|            | 12         | -                                        | 1000mg<br>bid                  | -           | -                         | -                    | 50mg tid        | -           | -                  | -            | 10m<br>g qd      |
|            | 13         | -                                        | 500mg bid                      | -           | -                         | -                    | 50mg tid        | -           | -                  | -            | 0.6m<br>g<br>8am |
|            | <b>DP+</b> | 14                                       | -                              | 500mg qid   | -                         | -                    | -               | -           | -                  | -            | -                |
| 15         |            | -                                        | 500mg tid                      | 60m<br>g qd | -                         | -                    | -               | -           | -                  | -            | -                |
| 16         |            | -                                        | 500mg qid                      | -           | -                         | -                    | 100mg<br>tid    | -           | -                  | 100m<br>g qd | -                |
| 17         |            | 18IU qn                                  | 500mg tid                      | 60m<br>g qd | -                         | -                    | -               | -           | -                  | -            | -                |
| 18         |            | -                                        | 500mg tid                      | -           | -                         | -                    | -               | 100mg<br>qd | -                  | -            | -                |
| 19         |            | -                                        | 500mg tid                      | -           | -                         | -                    | -               | 100mg<br>qd | -                  | -            | -                |
| 20         |            | 8IU 8am;                                 | 1000mg<br>bid                  | -           | 2mg<br>qd                 | -                    | 50mg tid        | -           | -                  | -            | -                |



|    |                                                 |           |              |                                     |   |                                                |             |   |   |             |   |                  |
|----|-------------------------------------------------|-----------|--------------|-------------------------------------|---|------------------------------------------------|-------------|---|---|-------------|---|------------------|
| 5  | 8IU<br>11am;<br>8IU 4pm;<br>20IU qn             | -         | 500mg tid    | 60m<br>g<br>8am;<br>30m<br>g<br>4pm | - | -                                              | -           | - | - | -           | - | -                |
| 6  | 8IU 8am;<br>6IU<br>11am;<br>6IU 4pm;<br>16IU qn | -         | -            | -                                   | - | -                                              | -           | - | - | -           | - | -                |
| 7  | -                                               | 500mg bid | -            | 2mg<br>bid                          | - | 100mg<br>tid                                   | -           | - | - | -           | - | -                |
| 8  | -                                               | 500mg bid | -            | -                                   | - | -                                              | 100mg<br>qd | - | - | 10m<br>g qd | - | -                |
| 9  | 16IU 8am                                        | 500mg tid | 30m<br>g qd  | -                                   | - | 50mg tid                                       | -           | - | - | -           | - | -                |
| 10 | -                                               | -         | -            | -                                   | - | 100mg<br>tid                                   | 100mg<br>qd | - | - | -           | - | 1.2m<br>g<br>8am |
| 11 | 18IU 8am                                        | 500mg tid | 60m<br>g bid | -                                   | - | 50mg<br>8am;<br>100mg<br>11am;<br>100mg<br>4pm | -           | - | - | -           | - | -                |

INS, insulin. DMBG, dimethylbiguanide (Metformin). SU, sulfonylurea. Glic, Gliclazide. Glim, Glimperide. MG, Meglitinides.  $\alpha$ -GCCase inhibitor,  $\alpha$ -glucosidase inhibitor. DPP-4 inhibitor, dipeptidyl peptidase-4 inhibitor. Sita, Sitagliptin. Saxa, Saxagliptin. SGLT2 inhibitor, sodium-dependent glucose transporters 2 inhibitor. Empa, Empagliflozin. Dapa, Dapagliflozin. GLP-1a, glucagon-like peptide-1 analogue. qn, quaque nocte. qd, quaque die. bid, bis in die. tid, ter in die. qid, quater in die
